# Supplementary material
Source: PubMed Central journal article supplement (PMC7116433)

Figure 2

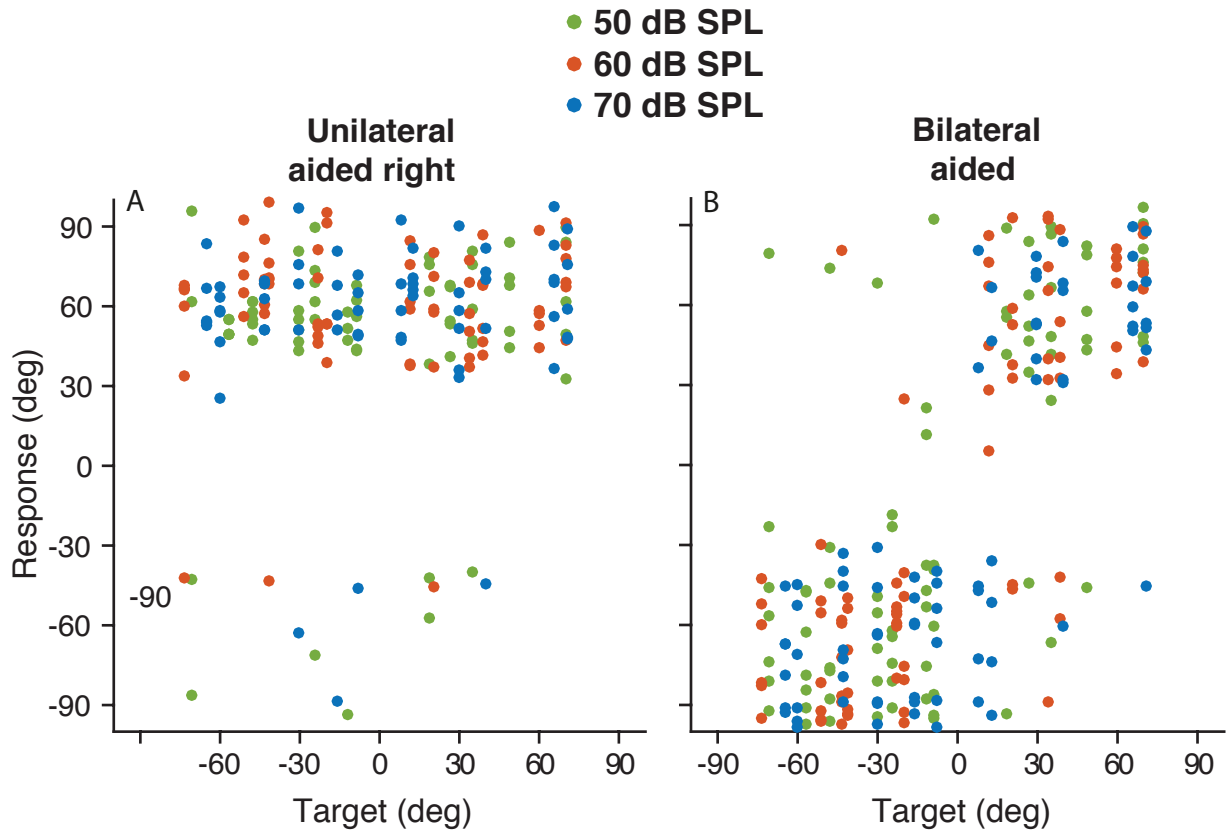

Supplement: EMS96500-supplement-Supplementary_Figure_2.pdf [file EMS96500-supplement-Supplementary_Figure_2.pdf]
